# Supplementary material for: Flexible Sensors Array Based on Frosted Microstructured Ecoflex Film and TPU Nanofibers for Epidermal Pulse Wave Monitoring
Source: MDPI journal article supplement (doi:10.3390/s23073717), 2023-04-03
Supplement: s1 [file s1]

## **Supplementary Materials**

### **Flexible sensors array based on frosted microstructured Ecoflex film and TPU nanofibers for epidermal pulse waves monitoring**

Xue Wang<sup>1,2</sup>, Zhiping Feng<sup>1,2</sup>, Gaoqiang Zhang<sup>1,2</sup>, Luna Wang<sup>1,2</sup>, Liang Chen<sup>1,2</sup>, Jin Yang<sup>1,2,\*</sup>, Zhonglin Wang<sup>3,\*</sup>

<sup>1</sup>State key laboratory of coal mine disaster dynamics and control, Chongqing University, Chongqing 400044, P. R. China.

<sup>2</sup>Key Laboratory of Optoelectronic Technology and Systems Ministry of Education, Department of Optoelectronic Engineering, Chongqing University, Chongqing 400044, China

<sup>3</sup>Beijing Institute of Nanoenergy and Nanosystems, Chinese Academy of Sciences, Beijing 100083, P. R. China.

\*Authors to whom correspondence should be addressed. Electronic mail:

Email: yangjin@cqu.edu.cn (J.Y.),

Email: [zhong.wang@mse.gatech.edu](mailto:zhong.wang@mse.gatech.edu);

## Supporting Figures and Captions

Table S1 Comparison of pulse pressure sensor performance

| Principle        | Structure                         | Sensitivity                     | Response time | Area                             | Array | Reference |
|------------------|-----------------------------------|---------------------------------|---------------|----------------------------------|-------|-----------|
| piezoresistivity | nanofibers                        | -                               | -             | $8 \times 5 \text{ cm}^2$        | No    | 15        |
|                  | bumps                             | $10.53 \text{ kPa}^{-1}$        | 60 ms         | $2 \times 2 \text{ cm}^2$        | No    | 16        |
|                  | microstructured fibroin           | -                               | -             | $8 \times 6 \text{ cm}^2$        | No    | 17        |
|                  | fabric                            | $0.585 \text{ kPa}^{-1}$        | 4 ms          | -                                | No    | 18        |
|                  | urchin-like microstructure        | $680 \text{ kPa}^{-1}$          | 10 ms         | $>1 \text{ cm}^2$                | No    | 19        |
|                  | micropyramid                      | $10.32 \text{ kPa}^{-1}$        | -             | $0.9 \times 0.9 \text{ cm}^2$    | No    | 20        |
|                  | hierarchically microstructure     | $53 \text{ kPa}^{-1}$           | 38 ms         | $\sim 1 \times 1.5 \text{ cm}^2$ | No    | 21        |
|                  | crack                             | $>10^7 \Omega \text{ kPa}^{-1}$ | -             | $\sim 1 \times 0.5 \text{ cm}^2$ | No    | 22        |
| capacitance      | paper                             | $0.23 \text{ kPa}^{-1}$         | 41 ms         | -                                | Yes   | 23        |
|                  | microhairy                        | $0.58 \text{ kPa}^{-1}$         | 30 ms         | -                                | No    | 24        |
|                  | porous Pyramid                    | $44.5 \text{ kPa}^{-1}$         | -             |                                  | Yes   | 25        |
|                  | pyramid                           | $4.5 \text{ kPa}^{-1}$          | 50            | $14 \times 4 \text{ mm}^2$       | Yes   | 26        |
|                  | Iontronic                         | $13.5 \text{ kPa}^{-1}$         | 30 ms         | $10 \times 10 \text{ mm}^2$      | No    | 27        |
|                  | pyramid                           | $41 \text{ kPa}^{-1}$           | 20 ms         | $8 \times 8 \text{ cm}^2$        | No    | 28        |
|                  | nanofibrous                       | $5.5 \text{ kPa}^{-1}$          | 70.4 ms       | $5 \times 5 \text{ cm}^2$        | Yes   | 29        |
|                  | airgap                            | $1.277 \text{ kPa}^{-1}$        | 100 ms        | $20 \times 20 \text{ mm}^2$      | No    | 30        |
| piezoelectricity | PZT                               | $0.018 \text{ kPa}^{-1}$        | 60 ms         | -                                | No    | 31        |
|                  | PZT                               | $1.36 \text{ uA Pa}^{-1}$       | 0.1 ms        | -                                | Yes   | 32        |
|                  | sandwich                          | $32.6 \text{ nA/kPa}^{-1}$      | 18.6 ms       | $6 \times 4 \text{ cm}^2$        | Yes   | 33        |
|                  | microdome                         | $47.7 \text{ kPa}^{-1}$         | 20 ms         | $\sim 1 \times 1.5 \text{ cm}^2$ | No    | 34        |
| triboelectric    | 3D dielectric geometry            | $0.33 \text{ V kPa}^{-1}$       | -             | $15 \times 15 \text{ mm}^2$      | No    | 35        |
|                  | curved surface                    | $46.9 \text{ V/N}$              | 72 ms         | $2 \times 2 \text{ cm}^2$        | No    | 36        |
|                  | hierarchical elastomer            | $7.989 \text{ V kPa}^{-1}$      | 40 ms         | $1 \times 1 \text{ cm}^2$        | Yes   | 37        |
|                  | weaving structure                 | $45.7 \text{ mV Pa}^{-1}$       | 5             | $1 \times 1 \text{ cm}^2$        | No    | 38        |
|                  | nanostructure                     | -                               | -             | $2 \times 1 \text{ cm}^2$        | Yes   | 39        |
|                  | multilayer structure              | $10.29 \text{ nA/kPa}$          |               | $\sim 2 \times 1 \text{ cm}^2$   | No    | 40        |
| This work        | frosted microstructure nanofibers | $0.14 \text{ V/kPa}$            | 22 ms         | $0.6 \times 0.6 \text{ cm}^2$    | Yes   | -         |

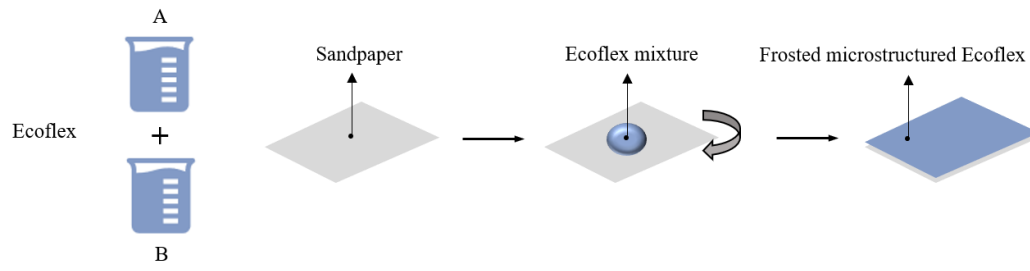

**Figure S1.** The detailed fabrication procedures of the frosted microstructured Ecoflex film.

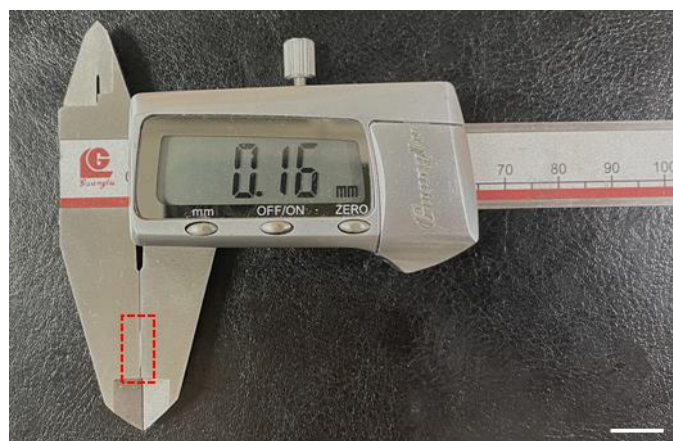

**Figure S2.** The thickness test photo of the Ecoflex film. Scale bar, 1 cm.

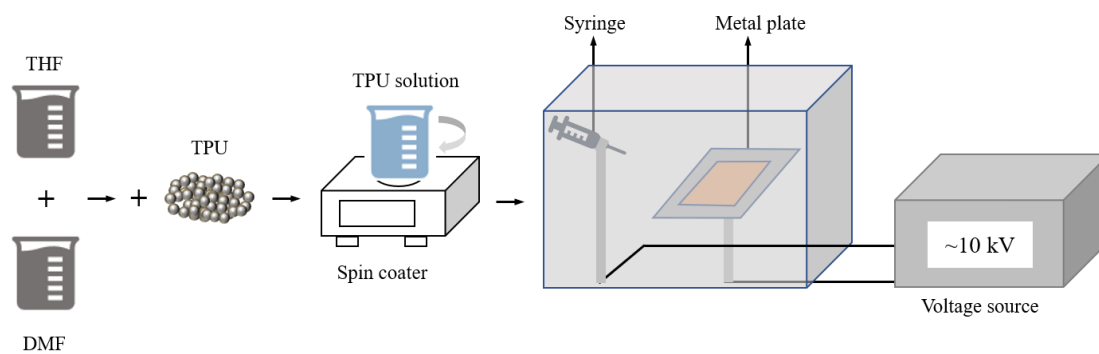

**Figure S3.** The detailed fabrication procedures of the TPU nanofibers.

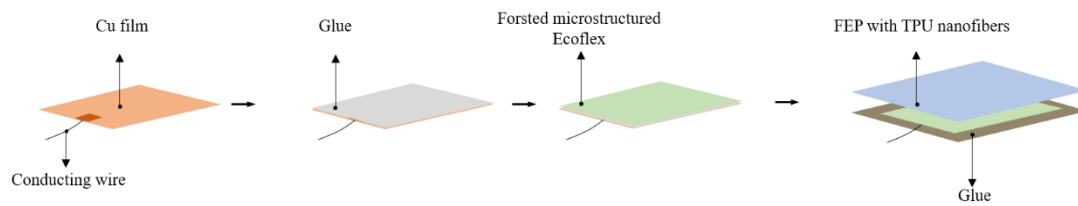

**Figure S4.** The detailed fabrication process of the designed sensor.

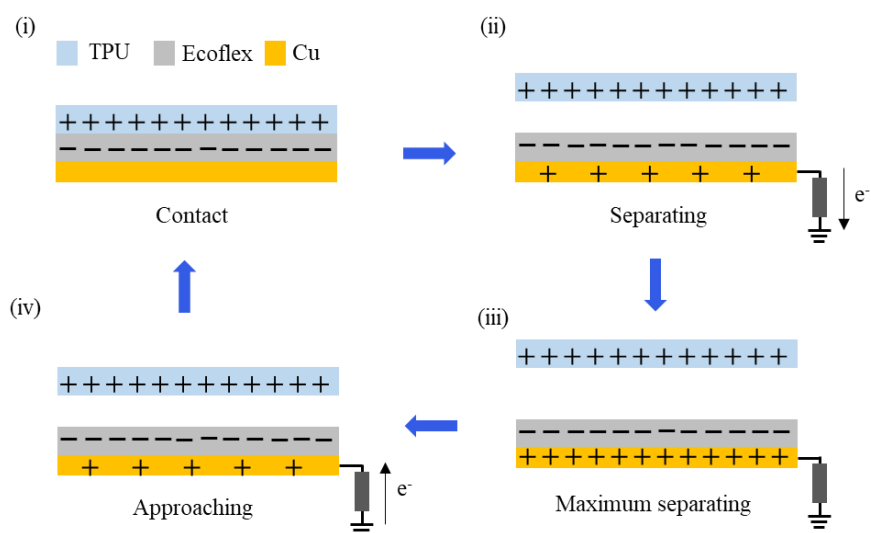

**Figure S5.** The working principle of the designed sensor.

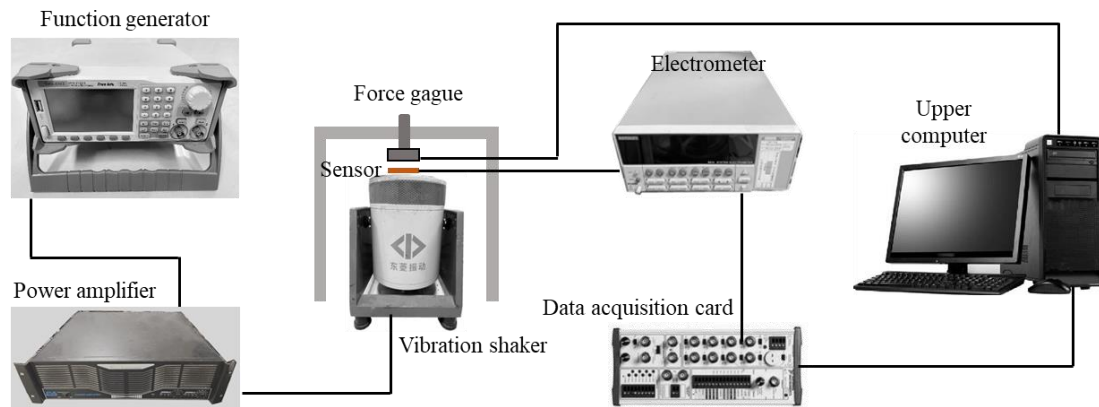

**Figure S6.** A measuring system containing a function generator, power amplifier, vibration shaker, force gauge, electrometer, data acquisition card, and upper computer.



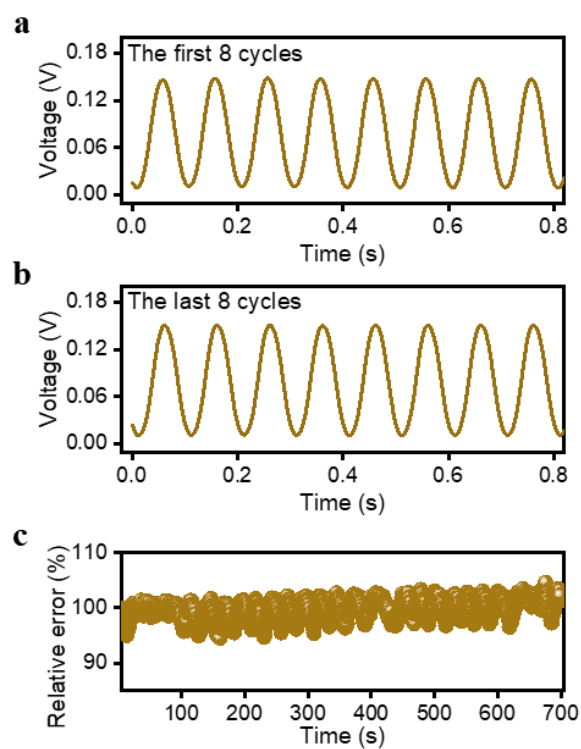

**Figure S7.** The stability of the sensor. (a) The first and (b) last 8 cycles in 7000 cycles consecutive measurement. (c) The percentage variation of the output voltage amplitude during the acquisition time.

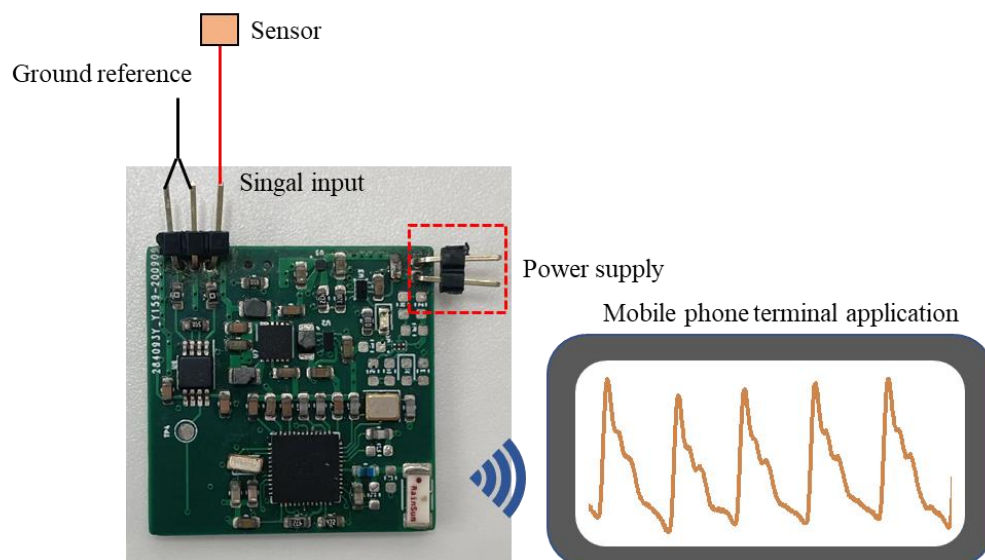

**Figure S8.** The optical view of the hardware circuit system with size of  $2.7 \times 2.6 \times 0.5$   $\text{cm}^3$  and the connection of the sensor and circuit.

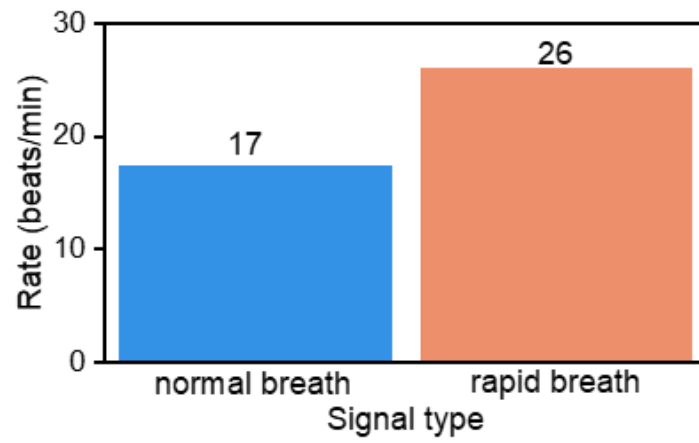

**Figure S9.** The corresponding respiratory rate under two different breath conditions (normal, rapid breathing).

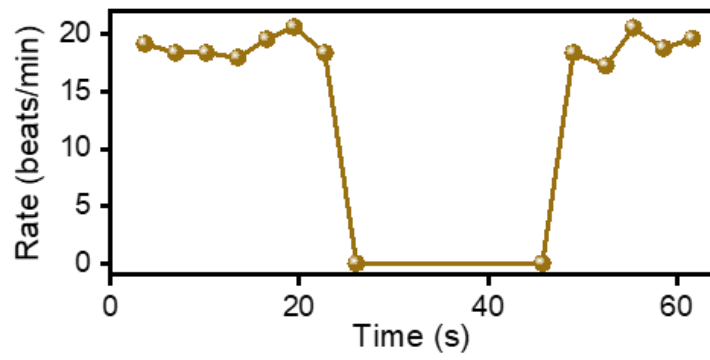

**Figure S10.** The corresponding respiratory rate under three different states (normal breathing, holding breathing, and back to normal breathing).

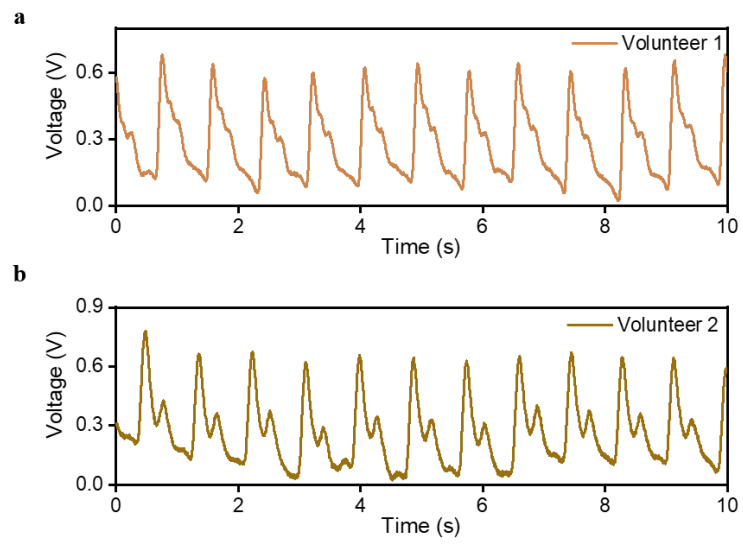

**Figure S11.** The pulses wave at wrist of different individuals.

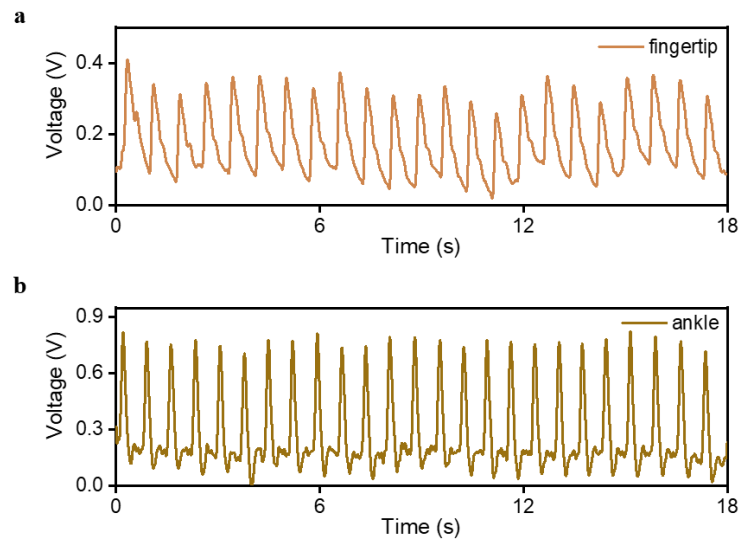

**Figure S12.** The measured pulse waves at fingertip and ankle.

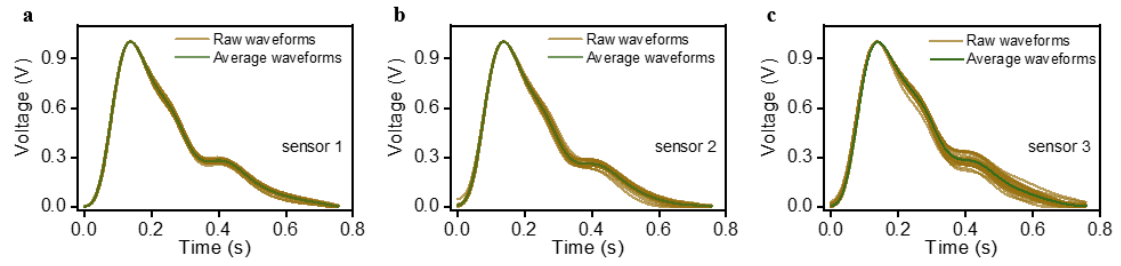

**Figure S13.** The consistency of the measured pulse waves by single sensor. (a) The consistency of the pulse signals measured by sensor 1 in the same measurement process. (b) The consistency of the pulse signals measured by sensor 2 in the same measurement process. (c) The consistency of the pulse signals measured by sensor 3 in the same measurement process.

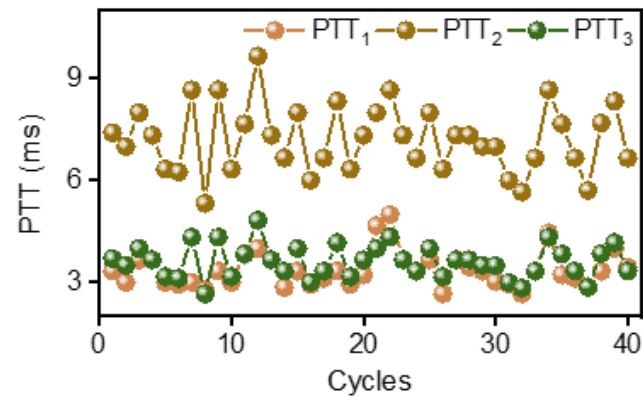

**Figure S14.** The change trend of PTT obtained by calculating the time difference between pulse signal peaks at different positions in the same cardiac cycle.
